# Supplementary material for: The Availability and Nutritional Adequacy of Gluten-Free Bread and Pasta
Source: MDPI journal article supplement (doi:10.3390/nu10101370), 2018-09-25
Supplement: s1 [file s1]

Table 1. List of products identified in the survey with their back of pack nutrient information (energy, macronutrients and salt values in g per 100 grams) and fortification.

|             | Type     | Product                                              | Cost (£/100 g) | Energy kJ | Energy kcal | Fat | Of which saturates | Carbohydrate | Of which Sugars | Fibre | Protein | Salt | Fortified with minerals and vitamins | Fortified with minerals only |
|-------------|----------|------------------------------------------------------|----------------|-----------|-------------|-----|--------------------|--------------|-----------------|-------|---------|------|--------------------------------------|------------------------------|
| White Bread | Standard | Hovis Soft White Medium Bread 800G                   | 0.13           | 987       | 233         | 1.7 | 0.3                | 44.6         | 3.5             | 2.4   | 8.7     | 0.9  | x                                    |                              |
|             |          | Warburtons Toastie Sliced White Bread 800G           | 0.13           | 1025      | 244         | 2   | 0.5                | 46.4         | 3               | 2.3   | 9.1     | 0.98 | x                                    |                              |
|             |          | Tesco White Medium Bread 800G                        | 0.06           | 1007      | 238         | 2.2 | 0.4                | 44.6         | 2.8             | 2.9   | 8.5     | 1    | x                                    |                              |
|             |          | Kingsmill Soft White Medium 800g                     | 0.11           | 1007      | 238         | 2   | 0.6                | 45.6         | 3.8             | 2.7   | 8       | 1    | x                                    |                              |
|             |          | Tesco Everyday Value Sliced White Bread 800G         | 0.05           | 991       | 234         | 1.5 | 0.3                | 46.3         | 4.9             | 2.6   | 7.5     | 1    | x                                    |                              |
|             |          | Warburtons Farmhouse White Bread 800G                | 0.17           | 1021      | 243         | 2.5 | 0.5                | 45           | 2.2             | 2.3   | 9       | 0.98 | x                                    |                              |
|             |          | Sainsbury's Soft Medium Sliced White Bread 800g      | 0.07           | 1013      | 239         | 2.2 | 0.5                | 45.6         | 2.5             | 2.3   | 8.1     | 0.89 | x                                    |                              |
|             |          | Sainsbury's Medium Sliced White Bread, Basics 800g   | 0.05           | 1005      | 238         | 1.9 | 0.3                | 45.5         | 4.1             | 3.2   | 8.1     | 0.9  | x                                    |                              |
|             |          | Warburtons Toastie Thick Sliced White Bread 400g     | 0.13           | 1025      | 244         | 2   | 0.5                | 45.4         | 2.9             | 2.1   | 9.1     | 0.98 | x                                    |                              |
|             |          | Sainsbury's White Farmhouse Bread 800g               | 0.13           | 1027      | 242         | 0.9 | 0.1                | 48.1         | 3.2             | 2.7   | 9.1     | 0.93 | x                                    |                              |
|             |          | ASDA Baker's Selection Square Cut Medium White Bread | 0.74           | 1013      | 239         | 2.2 | 0.5                | 46           | 2.5             | 2.3   | 8.1     | 0.89 | x                                    |                              |
|             |          | ASDA Extra Special Farmhouse White Bread             | 0.11           | 1006      | 238         | 2   | 0.3                | 45           | 3.8             | 2.2   | 8.8     | 0.88 | x                                    |                              |
|             |          | Roberts Bakery White Bloomer 600g                    | 0.19           | 1039      | 246         | 3.2 | 0.6                | 43.7         | 2.9             | 3.8   | 8.6     | 1    | x                                    |                              |
|             |          | Morrisons Medium White Loaf 800g                     | 0.06           | 985       | 232         | 1.2 | 0.2                | 45           | 2.8             | 2.6   | 9.1     | 0.9  | x                                    |                              |
|             |          | M savers White Loaf 720g                             | 0.05           | 1068      | 252         | 1.1 | 0.2                | 50.4         | 4.1             | 3.2   | 8.5     | 0.9  | x                                    |                              |
|             |          | Warburtons Sliced White Rolls 8 per pack             | 0.27           | 1113      | 265         | 3.9 | 0.8                | 46.6         | 3               | 2.4   | 9.7     | 0.98 | x                                    |                              |
|             |          | ASDA Baker's Selection Super Soft White Rolls        | 0.31           | 1151      | 272         | 4.6 | 0.7                | 49           | 3.4             | 2.5   | 7.5     | 0.93 | x                                    |                              |
|             |          | Kingsmill Soft White Sliced Rolls                    | 0.23           | 1138      | 270         | 5.6 | 1.1                | 45.5         | 3.5             | 2.7   | 8       | 0.85 | x                                    |                              |
|             |          | Tesco White Baps 4 Pack                              | 0.13           | 1093      | 259         | 3.9 | 2                  | 44           | 3.7             | 3     | 10.4    | 0.8  | x                                    |                              |
|             |          | Kingsmill Soft White Rolls 6 Pack                    | 0.27           | 1138      | 270         | 4.5 | 0.9                | 47.9         | 4.6             | 2.7   | 8       | 1    | x                                    |                              |
|             |          | Sainsbury's White Jumbo Hot Dog Rolls x6             | 0.19           | 1058      | 250         | 3.3 | 0.9                | 45           | 4.3             | 3.5   | 8.4     | 0.98 | x                                    |                              |
|             |          |                                                      |                |           |             |     |                    |              |                 |       |         |      |                                      |                              |
|             | GF       | Tesco Free From White Rolls 4 Pack                   | 0.61           | 835       | 199         | 4.1 | 0.3                | 30.9         | 1.5             | 8.9   | 5.1     | 1.1  |                                      |                              |
|             |          | Tesco Free From Sliced White Bread 550G              | 0.38           | 844       | 201         | 4.1 | 0.3                | 32.5         | 0.6             | 6.4   | 5.2     | 1    |                                      |                              |
|             |          | Schar White Ciabatta Rolls 200G                      | 1              | 900       | 213         | 1.8 | 0.3                | 41           | 2.7             | 8.3   | 4.1     | 1    |                                      |                              |
|             |          | Ds Wholesome White Sliced Loaf 300G                  | 0.83           | 1009      | 239         | 3.4 | 0.7                | 45           | 3.3             | 7.3   | 3.5     | 1    |                                      |                              |
|             |          | Genius Gluten Free Toastie 500G                      | 0.54           | 1142      | 272         | 6.1 | 0.4                | 47           | 3.9             | 9.3   | 2.4     | 0.9  | x                                    |                              |
|             |          | Newburn Bakehouse Mini Loaf White 300G               | 0.58           | 1046      | 249         | 6.5 | 0.6                | 37.9         | 1.6             | 5.8   | 6.7     | 0.83 |                                      |                              |
|             |          | Warburtons Newburn Bakehouse White Sourdough Artisan | 0.8            | 1040      | 248         | 5.9 | 0.6                | 39.1         | 2.6             | 5.4   | 6.8     | 0.84 |                                      |                              |
|             |          | ASDA Free From White Sliced Loaf                     | 0.37           | 1126      | 268         | 7.2 | 0.5                | 46           | 0.9             | 5.4   | 2.3     | 0.92 |                                      |                              |
|             |          | Schar Gluten Free Wholesome White Loaf               | 0.78           | 1009      | 239         | 3.4 | 0.7                | 45           | 3.3             | 7.3   | 3.5     | 1    |                                      |                              |

|              |          |                                                                   |      |      |     |     |     |      |     |     |      |      |   |   |
|--------------|----------|-------------------------------------------------------------------|------|------|-----|-----|-----|------|-----|-----|------|------|---|---|
|              |          | Genius Gluten Free White Rolls                                    | 0.81 | 1176 | 280 | 7   | 0.5 | 49.2 | 6.9 | 5.9 | 2    | 0.67 |   |   |
|              |          | Genius Gluten Free Soft White Sandwich Loaf                       | 0.46 | 1143 | 272 | 6.1 | 0.4 | 47   | 3.9 | 9.3 | 2.4  | 0.9  | x |   |
|              |          | Schar Gluten Free Hamburger Buns                                  | 0.95 | 855  | 202 | 1.1 | 0.1 | 42   | 7.7 | 5.7 | 3.2  | 0.87 |   |   |
|              |          | Schar Gluten Free Panini Rolls                                    | 0.88 | 1019 | 241 | 3   | 0.5 | 46   | 2.7 | 7.4 | 3.9  | 1.1  |   |   |
|              |          | Warburtons Gluten Free White Farmhouse Loaf 560g                  | 0.54 | 983  | 234 | 5.4 | 0.5 | 35.8 | 1.3 | 5.7 | 7.8  | 0.8  |   | x |
|              |          | Warburtons Gluten Free White Rolls 4pk                            | 0.96 | 1025 | 244 | 6.2 | 0.5 | 37.1 | 1.5 | 5.4 | 7.3  | 0.9  |   | x |
|              |          | Warburtons Tiger Artisan Bloomer, Gluten Free 400g                | 0.88 | 966  | 230 | 5.3 | 0.5 | 38.5 | 2.6 | 5.5 | 7.1  | 0.84 |   |   |
|              |          | Schar Gluten Free White Rolls 348g                                | 0.69 | 1036 | 245 | 3.6 | 0.5 | 47   | 0.8 | 5.5 | 3.5  | 1.3  |   |   |
|              |          | Morrisons Free From Gluten Free White Bread 350g                  | 0.48 | 1061 | 252 | 6.4 | 0.5 | 43.6 | 1.5 | 6.1 | 2    | 0.86 |   |   |
|              |          | Morrisons Free From Gluten Free 4 White Rolls 4 x 65g             | 0.65 | 1091 | 259 | 6.6 | 0.5 | 44.9 | 1.6 | 5.6 | 2.3  | 0.86 |   |   |
|              |          |                                                                   |      |      |     |     |     |      |     |     |      |      |   |   |
| Brown Bread  | Standard | Tesco Wholemeal Medium Bread 800G                                 | 0.06 | 991  | 235 | 3   | 0.5 | 36.9 | 3.5 | 7.1 | 11.5 | 1    |   |   |
|              |          | Hovis Wholemeal Medium Bread 800G                                 | 0.13 | 934  | 221 | 1.8 | 0.4 | 37.8 | 4.1 | 6.8 | 10   | 0.9  | x |   |
|              |          | Kingsmill Tasty Wholemeal Medium Bread 800G                       | 0.11 | 984  | 233 | 2.8 | 0.6 | 38.6 | 4.3 | 6.3 | 10.2 | 1    |   |   |
|              |          | Warburtons Wholemeal Medium Bread 800G                            | 0.13 | 974  | 231 | 2.8 | 0.5 | 37.8 | 2.4 | 6.4 | 10.6 | 0.95 |   |   |
|              |          | Tesco Everyday Value Medium Sliced Wholemeal Bread 800G           | 0.05 | 975  | 231 | 2.5 | 0.4 | 39   | 3.4 | 7   | 9.6  | 0.9  |   |   |
|              |          | Allinson's Classic Wholemeal Loaf 650G                            | 0.19 | 974  | 231 | 2.6 | 0.4 | 38.7 | 2.8 | 6.7 | 9.8  | 1    |   |   |
|              |          | Sainsbury's Medium Sliced Wholemeal Bread 800g                    | 0.07 | 986  | 234 | 2.9 | 0.6 | 36.7 | 3   | 6.6 | 11.9 | 0.88 |   |   |
|              |          | Sainsbury's Thick Sliced Wholemeal Bread, SO Organic 800g         | 0.18 | 1007 | 239 | 3.2 | 0.6 | 39.3 | 2.7 | 7.2 | 9.6  | 0.88 |   |   |
|              |          | ASDA Baker's Selection Square Cut Medium Wholemeal Bread          | 0.07 | 986  | 234 | 2.9 | 0.6 | 37   | 3   | 6.6 | 12   | 0.88 |   |   |
|              |          | Morrisons Wholemeal Medium Loaf 800g                              | 0.06 | 913  | 216 | 1.4 | 0.3 | 38   | 2.8 | 6.5 | 9.6  | 0.89 |   |   |
|              |          | Morrisons Wholemeal Toastie Loaf 800                              | 0.06 | 913  | 216 | 1.4 | 0.3 | 38   | 2.8 | 6.5 | 9.6  | 0.89 |   |   |
|              |          | Morrisons Wholemeal Rolls 6 per pack                              | 0.13 | 1006 | 238 | 2.8 | 0.4 | 40   | 3.2 | 5.9 | 10.3 | 0.8  |   |   |
|              |          | Kingsmill Tasty Wholemeal Rolls 6 Pack                            | 0.25 | 1032 | 245 | 3.7 | 0.9 | 39.1 | 4.7 | 6.5 | 10.5 | 0.93 |   |   |
|              |          | Warburtons Brown Sandwich Thins 6 Pack                            | 0.42 | 1058 | 252 | 2.8 | 0.9 | 45.2 | 3.9 | 3.5 | 9.9  | 0.98 | x |   |
|              |          | Tesco Wholemeal Batch Rolls 6 Pack                                | 0.11 | 1020 | 242 | 3.3 | 1.3 | 39.8 | 5   | 5.6 | 10.4 | 0.7  | x |   |
|              |          |                                                                   |      |      |     |     |     |      |     |     |      |      |   |   |
|              | GF       | Genius Brown Sliced Bread 535G                                    | 0.51 | 1131 | 269 | 6.6 | 0.5 | 45   | 2.4 | 10  | 2.5  | 0.9  | x |   |
|              |          | Schar Brown Ciabatta Rolls 200G                                   | 1    | 1150 | 274 | 8.1 | 1   | 40   | 3.7 | 8.9 | 5.8  | 1    |   |   |
|              |          | Tesco Free From Brown Bread 550G                                  | 0.38 | 811  | 193 | 4   | 0.3 | 29.3 | 0.7 | 9.3 | 5.3  | 1    |   |   |
|              |          | Newburn Bakehouse Brown Loaf 560g                                 | 0.53 | 983  | 234 | 5.4 | 0.5 | 35.8 | 1.3 | 5.7 | 7.8  | 0.8  |   | x |
|              |          | ASDA Free From Brown Sliced Loaf                                  | 0.37 | 1098 | 261 | 7   | 0.5 | 44   | 1.6 | 5.8 | 2.2  | 0.85 |   |   |
|              |          |                                                                   |      |      |     |     |     |      |     |     |      |      |   |   |
| Seeded Bread | Standard | Hovis Seed Sensations Seven Seeds Medium Sliced Seeded Bread 800g | 0.16 | 1171 | 278 | 6.6 | 0.6 | 42   | 3.8 | 5.3 | 10   | 0.88 | x |   |
|              |          | Warburtons Thick Sliced Seeded Bread 800g                         | 0.19 | 1231 | 293 | 8.9 | 1.3 | 39.7 | 2.6 | 6   | 10.6 | 0.95 | x |   |

|  |    |                                                                                     |      |      |     |      |     |      |     |     |      |      |   |  |
|--|----|-------------------------------------------------------------------------------------|------|------|-----|------|-----|------|-----|-----|------|------|---|--|
|  |    | Hovis Seed Sensations Soft Granary Medium Sliced Seeded Bread 800g                  | 0.19 | 1157 | 275 | 6.6  | 0.8 | 41.3 | 4.6 | 4.9 | 10.1 | 0.83 | x |  |
|  |    | Sainsbury's Multiseeded Medium Sliced Bread Half Bloomer, Taste the Difference 400g | 0.13 | 1079 | 256 | 3.6  | 0.4 | 39.7 | 4.3 | 8.8 | 12   | 0.84 | x |  |
|  |    | Kingsmill Medium Sliced Seeded Bread Half Loaf 470g                                 | 0.17 | 1033 | 245 | 4.8  | 1.2 | 34.4 | 3.6 | 7.9 | 12.2 | 0.8  |   |  |
|  |    | Hovis Seed Sensations Sunflower & Pumpkin Medium Sliced Seeded Bread 400g           | 0.25 | 1260 | 301 | 10.8 | 1.6 | 32.4 | 2.8 | 9   | 14   | 0.96 | x |  |
|  |    | Allinson's Seeds & Grains Medium Sliced Bread 650g                                  | 0.15 | 1270 | 303 | 10.9 | 1.7 | 38.1 | 3.2 | 4.9 | 10.6 | 0.9  | x |  |
|  |    | Sainsbury's Ancient Grains Medium Sliced White Bread, Taste the Difference 800g     | 0.13 | 1113 | 264 | 3.6  | 0.7 | 44.1 | 4.7 | 5.4 | 11   | 0.88 | x |  |
|  |    | Tesco Multiseed Farmhouse Batch Bread 800G                                          | 0.11 | 1127 | 268 | 6.5  | 0.7 | 39.9 | 3.2 | 6   | 9.4  | 1    | x |  |
|  |    | Tesco Finest Super Seeded Bread 800G                                                | 0.14 | 1203 | 287 | 8.9  | 1.1 | 37.8 | 3.4 | 6.6 | 10.5 | 1    | x |  |
|  |    | Tesco Finest Sunflower And Pumpkin Cob Bread 600G                                   | 0.18 | 1255 | 299 | 10.9 | 1.7 | 34.7 | 3.4 | 6.6 | 12.3 | 0.9  | x |  |
|  |    | Morrisons The Best Seeded Loaf 800g                                                 | 0.1  | 1144 | 272 | 6.4  | 0.7 | 39.6 | 2.3 | 5.2 | 11.3 | 0.67 | x |  |
|  |    | Burgen Soya & Linseed Loaf 800g                                                     | 0.18 | 1201 | 287 | 11   | 1.5 | 26.9 | 4.2 | 9.8 | 15.2 | 0.75 | x |  |
|  |    | Warburtons Malted Grain & Seeds 400g                                                | 0.3  | 1170 | 276 | 4.6  | 0.8 | 43.4 | 3.7 | 5.4 | 12.6 | 1    | x |  |
|  |    | Roberts Bakery Seeded Bloomer 600g                                                  | 0.2  | 1154 | 275 | 8.2  | 1.1 | 35.4 | 2.8 | 8.7 | 10.6 | 1    | x |  |
|  |    | Tesco Multiseed Deli Rolls 4 Pack                                                   | 0.4  | 1192 | 283 | 4.5  | 1.2 | 47.5 | 4.9 | 5.8 | 10.1 | 0.9  | x |  |
|  |    | Morrisons Medium Granary Rolls 4 per pack                                           | 0.28 | 1051 | 249 | 2.7  | 0.6 | 43.5 | 3.1 | 5.4 | 9.9  | 0.81 | x |  |
|  |    | Tesco Seeded Burger Buns                                                            | 0.11 | 1097 | 260 | 2.9  | 1.3 | 46.7 | 2.8 | 4.1 | 9.6  | 0.8  | x |  |
|  |    | Sainsbury's Large Multi Seeded Deli Rolls x4                                        | 0.34 | 1210 | 288 | 8.3  | 1.1 | 40   | 4.9 | 7.1 | 9.9  | 0.89 | x |  |
|  |    | Sainsbury's Wholemeal Seeded Rolls, SO Organic x4                                   | 0.34 | 1234 | 294 | 10.3 | 1.1 | 36   | 2.7 | 6.3 | 11.2 | 0.85 | x |  |
|  |    |                                                                                     |      |      |     |      |     |      |     |     |      |      |   |  |
|  | GF | Genius Gluten Free Triple Seeded Farmhouse Bread 535g                               | 0.52 | 1194 | 285 | 9.4  | 0.8 | 42.5 | 3.4 | 7.8 | 3.7  | 0.9  | x |  |
|  |    | Schar Wholesome Seeded Sliced Bread 300G                                            | 0.83 | 1042 | 248 | 6.2  | 0.9 | 40   | 2.8 | 7.4 | 4.3  | 0.85 |   |  |
|  |    | Tesco Free From Sliced Seeded Bread 550G                                            | 0.38 | 951  | 227 | 8.8  | 0.8 | 25.7 | 0.5 | 8.7 | 7    | 1    |   |  |
|  |    | Genius Gluten Free Wholesome Five Seeded 535G                                       | 0.52 | 1194 | 285 | 9.4  | 0.8 | 42.3 | 3.4 | 7.8 | 3.7  | 0.9  |   |  |
|  |    | Tesco Free From Multiseed Slice Bread 400G                                          | 0.45 | 1268 | 302 | 8.5  | 0.8 | 49.5 | 1.1 | 6.6 | 3.5  | 0.7  |   |  |
|  |    | Schar Wholesome Vitality Loaf Gluten Free 350G                                      | 0.74 | 1099 | 262 | 9.2  | 1.1 | 36   | 0.9 | 8.8 | 4.5  | 1    |   |  |
|  |    | Tesco Free From Brown Seeded Rolls 4 Pack                                           | 0.61 | 931  | 222 | 7.3  | 0.6 | 28.8 | 0.4 | 7.4 | 6.7  | 1    |   |  |
|  |    | Genius Multiseed Rolls 4 Pack                                                       | 0.71 | 1252 | 299 | 11.2 | 1   | 40.6 | 5.7 | 10  | 3.9  | 0.8  | x |  |
|  |    | Newburn Bakehouse Mini Loaf Seeded 300G                                             | 0.58 | 1163 | 277 | 10.9 | 1   | 33.5 | 1.5 | 7   | 7.7  | 0.8  |   |  |
|  |    | Burgen Free From Sunflower And Chia Seed Bread 500G                                 | 0.55 | 1201 | 286 | 10.3 | 0.8 | 39.7 | 2.7 | 5.4 | 6    | 1    |   |  |
|  |    | Bfree Brown Seeded Bloomer High Fibre 400G                                          | 0.75 | 928  | 222 | 5    | 0.6 | 32   | 0.5 | 9.7 | 7.8  | 1    |   |  |
|  |    | Schar Seeded Ciabatta Gluten Free 210G                                              | 0.98 | 1241 | 296 | 11   | 1.3 | 38   | 2.3 | 8   | 7.3  | 0.75 |   |  |
|  |    | Tesco Free From Ancient Grain Cob 400G                                              | 0.75 | 927  | 221 | 6.1  | 0.7 | 30.3 | 1.8 | 8   | 7.2  | 1    |   |  |

|       |                     |                                                   |      |      |        |      |      |       |      |      |      |       |  |  |
|-------|---------------------|---------------------------------------------------|------|------|--------|------|------|-------|------|------|------|-------|--|--|
|       |                     | Kelkin Sourdough Multiseed 200G                   | 1    | 1240 | 296    | 10   | 1.2  | 38    | 8.9  | 11   | 7.1  | 1.1   |  |  |
|       |                     | Morrisons Free From Gluten Free Seeded Bread 350g | 0.48 | 1072 | 255    | 7.9  | 0.7  | 39.9  | 1.3  | 6.4  | 3    | 0.75  |  |  |
|       |                     | Warburtons Seeded Farmhouse Loaf Gluten Free 560g | 0.54 | 1100 | 262    | 9.1  | 0.8  | 33    | 1.2  | 6.5  | 8.7  | 0.8   |  |  |
|       |                     |                                                   |      |      |        |      |      |       |      |      |      |       |  |  |
| Pasta | Standard Dry Values | Tesco Fusilli Pasta Twists 1Kg                    | 0.09 | 1526 | 360    | 1.4  | 0.3  | 73    | 2.4  | 2.6  | 12.5 | 0.1   |  |  |
|       |                     | Tesco Everyday Value Penne 500G                   | 0.06 | 1490 | 351    | 1.5  | 0.5  | 72    | 2.5  | 0.8  | 12   | 0.1   |  |  |
|       |                     | Napolina Short Spaghetti 500G                     | 0.25 | 1508 | 356    | 1.5  | 0.3  | 72    | 3    | 3    | 12   | 0.01  |  |  |
|       |                     | De Cecco Linguine 500G                            | 0.31 | 1493 | 352    | 1.5  | 0.3  | 70.2  | 3.4  | 2.9  | 13   | 0.01  |  |  |
|       |                     | Barilla Spaghetti 500G                            | 0.2  | 1521 | 359    | 2    | 0.5  | 71.2  | 3.5  | 3    | 12.5 | 0.013 |  |  |
|       |                     | Tesco Pasta Animals 500G                          | 0.18 | 1450 | 343    | 1.4  | 0.3  | 68    | 2.8  | 8    | 10.5 | 0.1   |  |  |
|       |                     | Tesco Margheritine Soup Pasta 250G                | 0.2  | 1526 | 360    | 1.4  | 0.3  | 73    | 2.4  | 2.6  | 12.5 | 0.1   |  |  |
|       |                     | De Cecco Fusilli 500G                             | 0.31 | 1493 | 352    | 1.5  | 0.3  | 70.2  | 3.4  | 2.9  | 13   | 0.01  |  |  |
|       |                     | Barilla Fusilli Pasta 500g                        | 0.25 | 1521 | 359    | 2    | 0.5  | 71.7  | 3.5  | 3    | 12   | 0.01  |  |  |
|       |                     | Morrisons Conchiglie 500g                         | 0.12 | 1581 | 373.33 | 2.00 | 0.53 | 74.93 | 2.93 | 2.40 | 6.53 | 0     |  |  |
|       |                     | Tesco Spaghetti 2Kg                               | 0.09 | 1526 | 360    | 1.4  | 0.3  | 73    | 2.4  | 2.6  | 12.5 | 0.1   |  |  |
|       |                     |                                                   |      |      |        |      |      |       |      |      |      |       |  |  |
|       | GF Dry Values       | Sainsbury's Deliciously Freefrom Fusilli 500g     | 0.26 | 1439 | 340    | 2.4  | 0.8  | 72    | 0.6  | 1.8  | 6.6  | 0.01  |  |  |
|       |                     | Doves Farm Gluten Free Organic Penne Pasta 500g   | 0.42 | 1516 | 357    | 1.3  | 0.4  | 78    | 0.2  | 1.4  | 7.4  | 0     |  |  |
|       |                     | Sainsbury's Buckwheat Penne 500g                  | 0.43 | 1555 | 368    | 3.2  | 0.4  | 34.5  | 0.2  | 3    | 6.4  | 0     |  |  |
|       |                     | Sainsbury's Deliciously Freefrom Spaghetti 500g   | 0.26 | 1439 | 340    | 2.4  | 0.4  | 36    | 0.5  | 0.9  | 3.3  | 0.01  |  |  |
|       |                     | Tesco Free From Fusilli Pasta 500G                | 0.24 | 1505 | 355    | 1    | 0.2  | 78.4  | 0.5  | 2    | 7    | 0.1   |  |  |
|       |                     | Barilla Gluten Free Spaghetti 400G                | 0.31 | 1524 | 359    | 1.8  | 0.3  | 78.7  | 1.2  | 1.1  | 6.5  | 0.01  |  |  |
|       |                     | Tesco Free From Penne Pasta 500G                  | 0.25 | 1505 | 355    | 1    | 0.2  | 78.4  | 0.5  | 2    | 7    | 0.1   |  |  |
|       |                     | Tesco Free From Lasagne Sheets 250G               | 0.5  | 1505 | 355    | 1    | 0.2  | 78.4  | 0.5  | 2    | 7    | 0.1   |  |  |
|       |                     | Sainsbury's Deliciously Freefrom Penne 500g       | 0.26 | 1439 | 340    | 2.4  | 0.8  | 72    | 0.6  | 1.8  | 6.6  | 0.01  |  |  |
|       |                     | Morrisons Free From Fusilli 500g                  | 0.27 | 1463 | 344    | 1    | 0    | 77    | 0.3  | 1.9  | 3.7  | 0.12  |  |  |
